# Supplementary material for: Chloride capping of CdTiO3 for higher crystallinity and enhanced photocatalytic activity
Source: Royal Society of Chemistry journal article supplement (doi:10.1039/c5cp06012e), 2015-11-27
Supplement: c5cp06012e1.pdf [file c5cp06012e1.pdf]

## Supporting Information

# Chloride capping of CdTiO<sub>3</sub> for higher crystallinity and enhanced photocatalytic activity

Zameer Hussain Shah, Yuzhen Ge, Xijie Lin, Jinghai Xiu, Shufen Zhang, and

Rongwen Lu\*

State Key Laboratory of Fine Chemicals, Dalian University of Technology, Dalian

116024, People's Republic of China.

\*Email: lurw@dlut.edu.cn

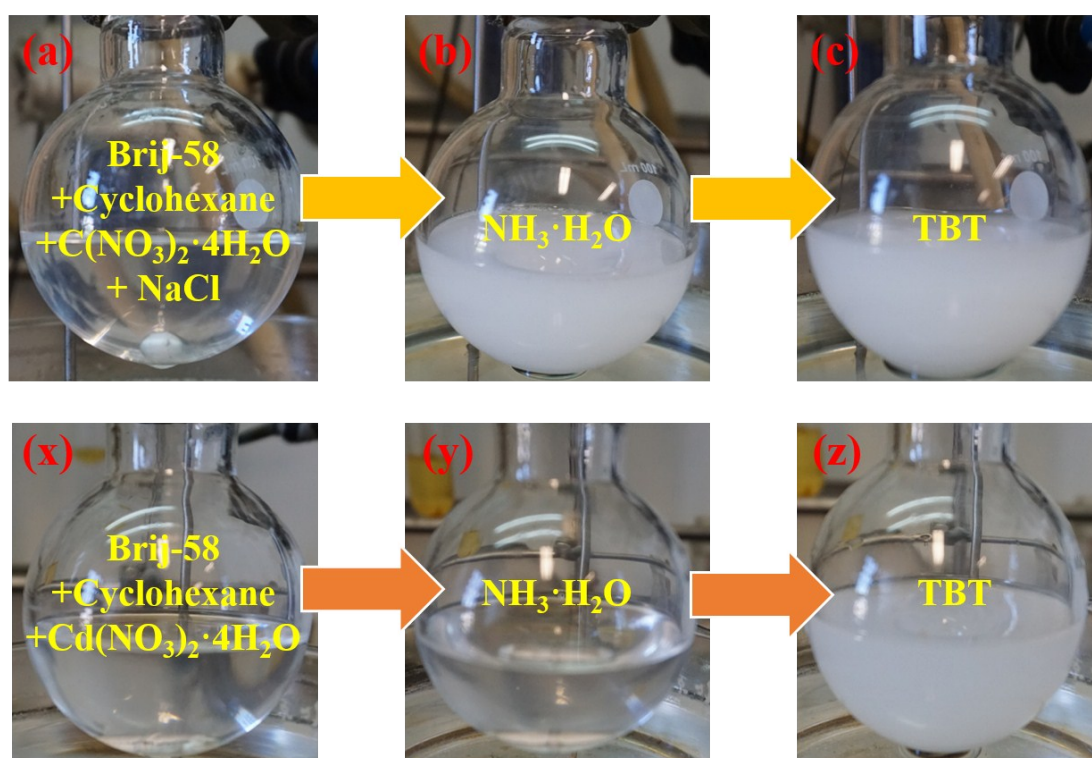

**Fig. S1** Synthesis of CdTiO<sub>3</sub>, in presence of NaCl (a, b, c) and in absence of NaCl

(x,y,z)

**SEM-EDS Analysis:** Energy dispersive X-ray spectroscopy (EDS) was performed on a field emission scanning electron microscope (FE-SEM, Nova Nanosem 450 FEI Company, USA). The acquired SEM images of the EDS analyses are given in Fig. S2. The corresponding EDS curves along with the elemental composition are depicted in Fig. S3. As can be seen in the Fig. S3, there is no big difference in the elemental compositions of all the as prepared samples. A very small amount of chloride was found only in the sample prepared using 0.25 M NaCl. It was also confirmed by XPS.

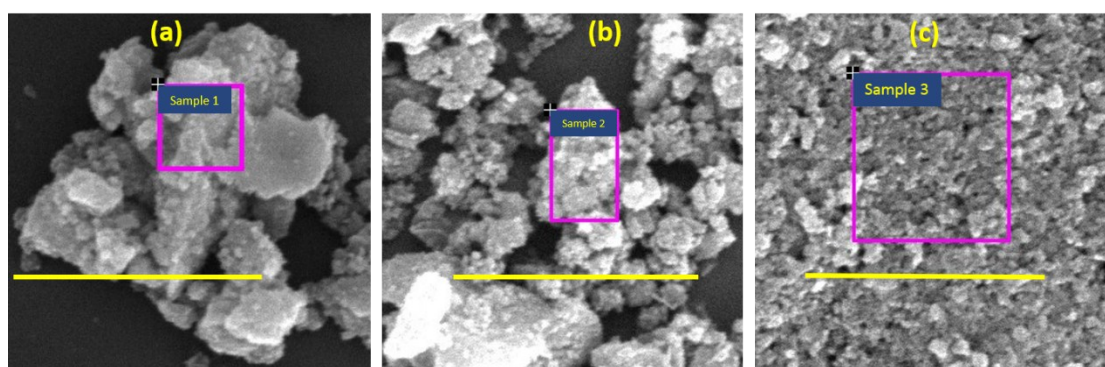

**Fig. S2** SEM images for (a) in absence of NaCl, (b) in presence of 0.075 M NaCl, and (c) in presence of 0.25 M NaCl. Scale bar is 3  $\mu\text{m}$  in all images.

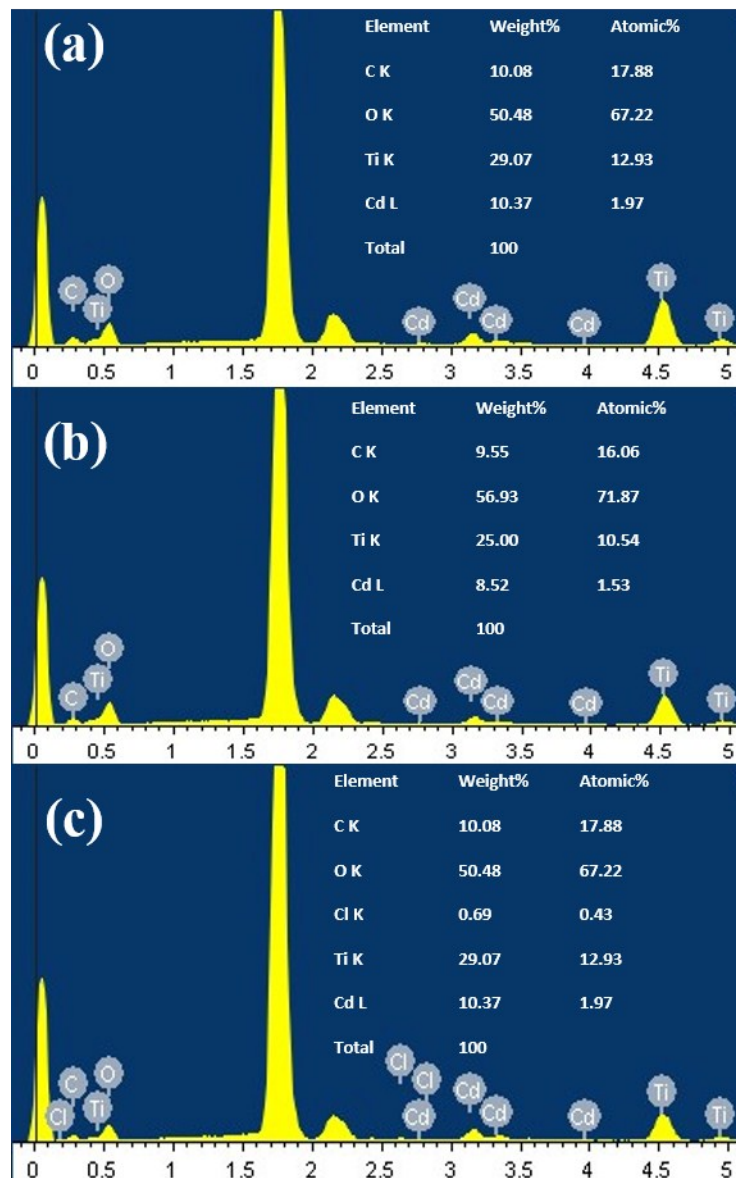

**Fig. S3** EDS of (a) in absence of NaCl, (b) in presence of 0.075 M NaCl, and (c) in presence of 0.25 M NaCl.

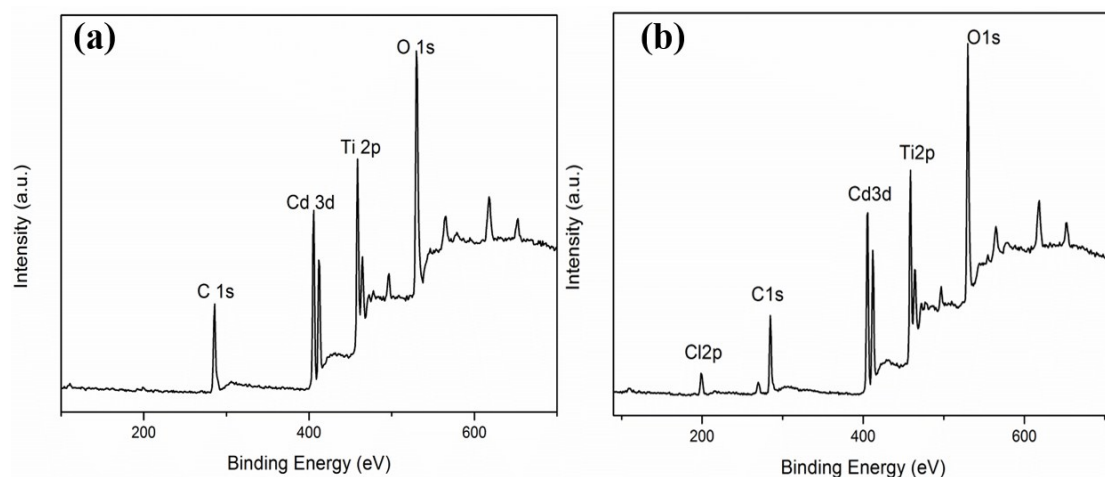

**Fig. S4** Full length XPS spectra of CdTiO<sub>3</sub> (a) synthesized in the absence of NaCl and (b) synthesized using 0.075 M NaCl.

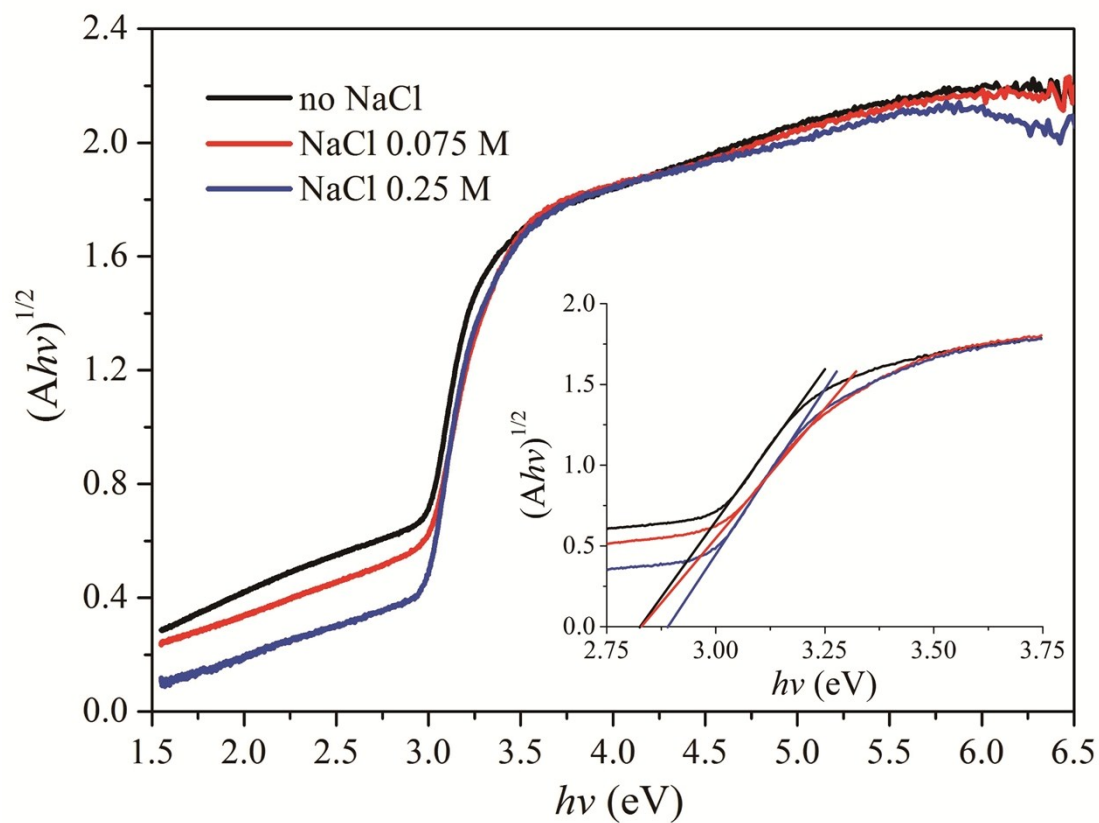

**Fig. S5** Plots of  $(Ah\nu)^{1/2}$  versus energy ( $h\nu$ ) to determine band gaps of the as synthesized samples. Inset is the magnified image of the plots.

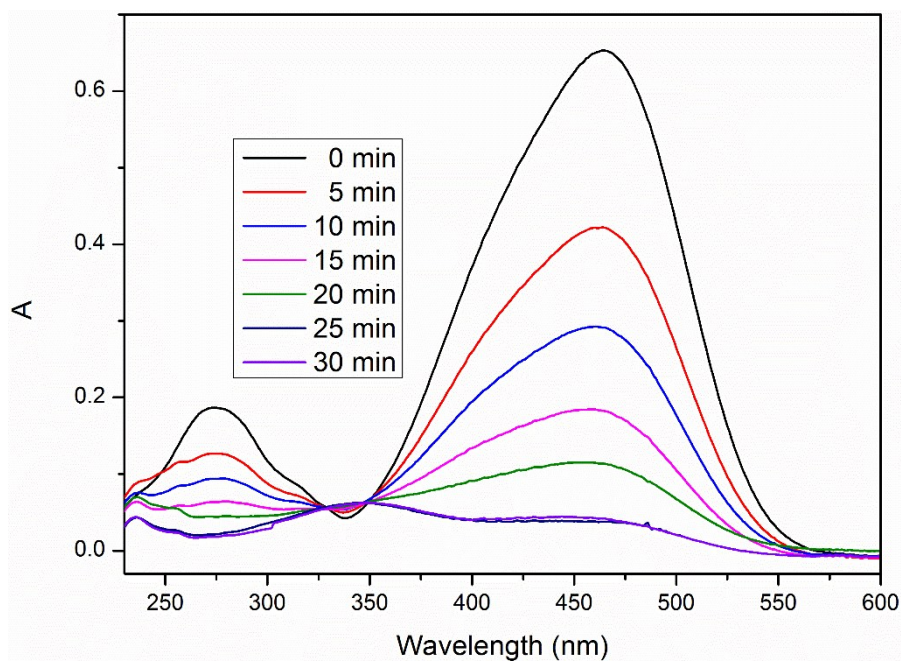

**Fig. S6** Change in concentration of MO during photocatalysis

**Table S1** Effect of chloride on BET surface area and pore volume of CdTiO<sub>3</sub>.

| Sample No. | Sample name  | BET surface area (m <sup>2</sup> /g) | Pore volume (cm <sup>3</sup> /g) |
|------------|--------------|--------------------------------------|----------------------------------|
| <b>01</b>  | No NaCl      | 34.087                               | 0.164                            |
| <b>02</b>  | 0.075 M NaCl | 22.883                               | 0.164                            |
| <b>03</b>  | 0.25 M NaCl  | 19.507                               | 0.212                            |

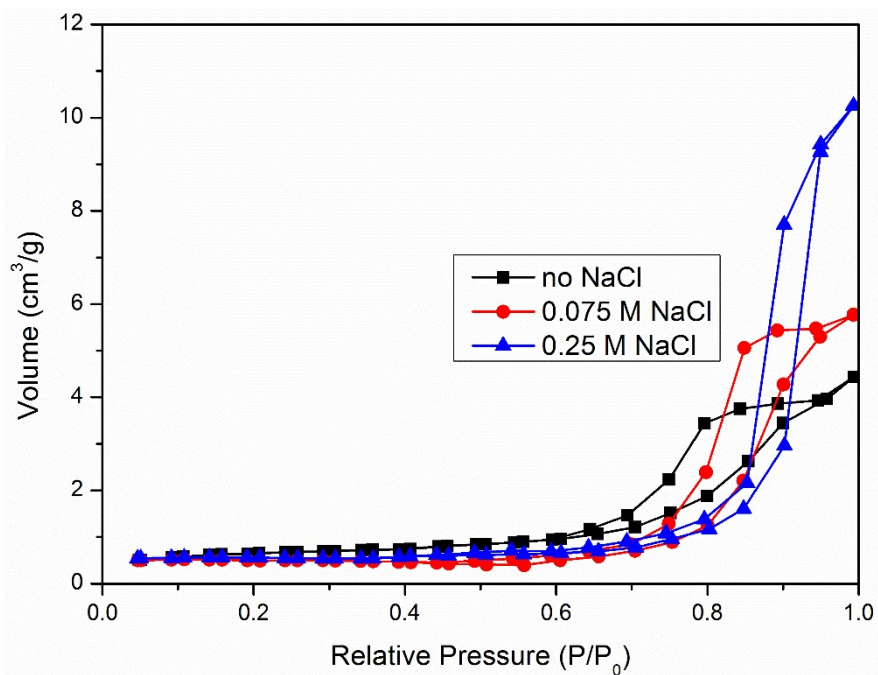

**Fig. S7** N<sub>2</sub> adsorption/desorption curves for the as synthesized samples of CdTiO<sub>3</sub>.

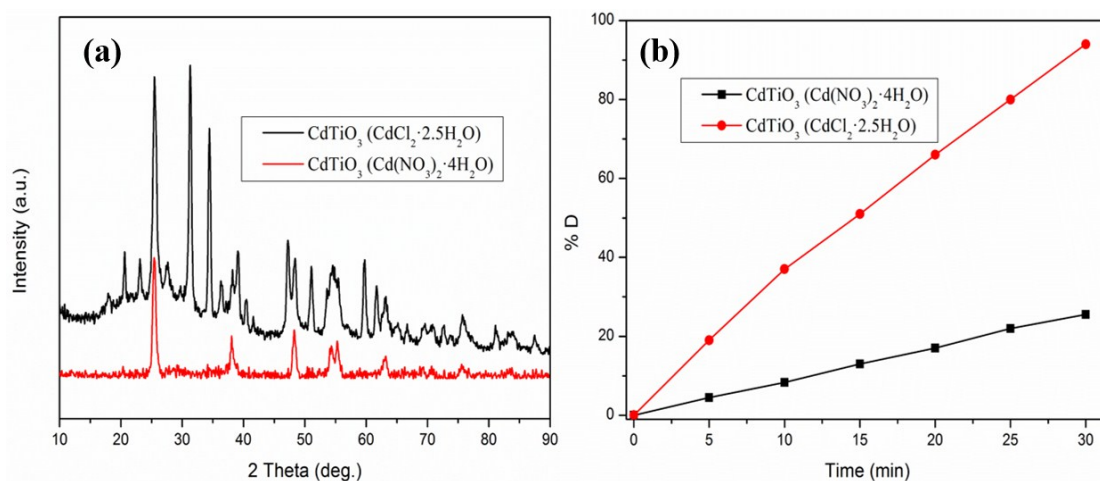

**Fig. S8** Comparison of CdTiO<sub>3</sub> synthesized from CdCl<sub>2</sub>·2.5H<sub>2</sub>O and Cd(NO<sub>3</sub>)<sub>2</sub>·4H<sub>2</sub>O

(a) XRD patterns and (b) Photodegradation of MO under simulated sunlight.
